# Supplementary material
Source: PubMed Central journal article supplement (PMC4793393)

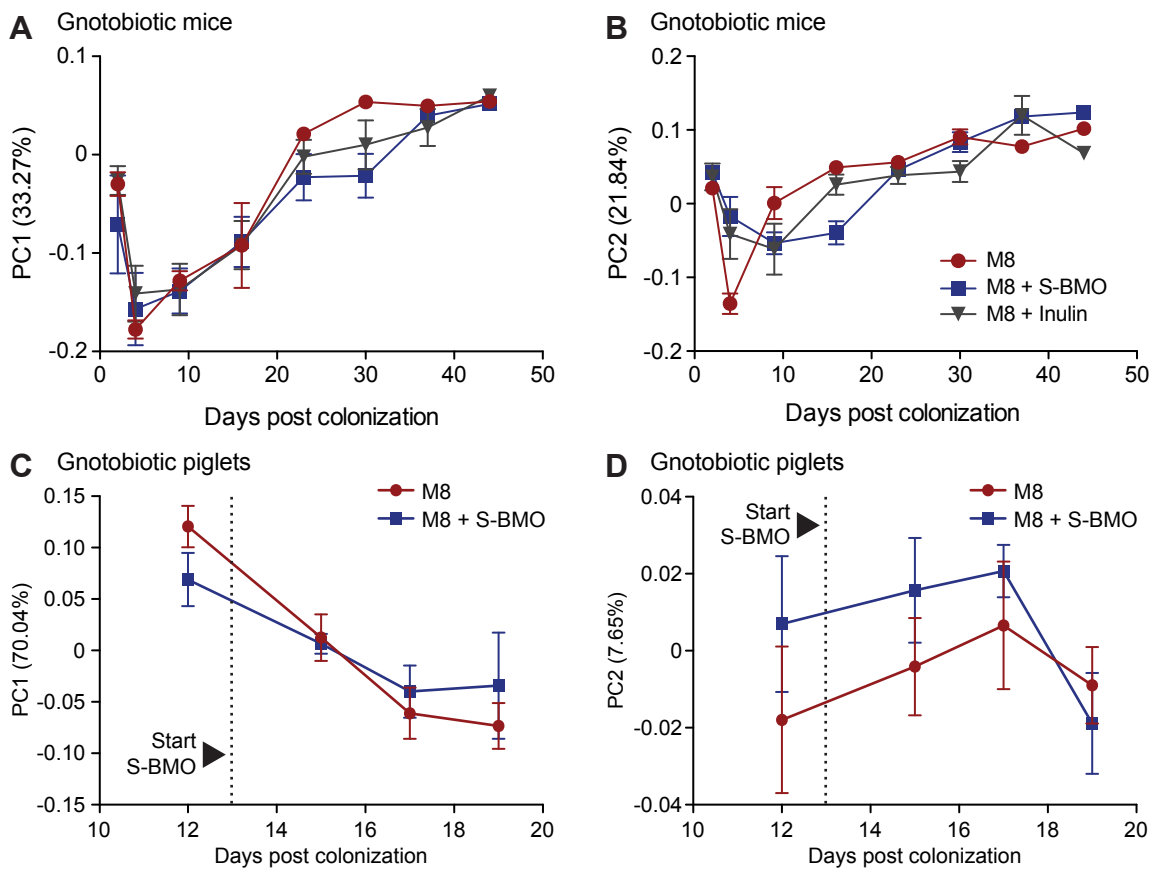

Supplement: NIHMS761338-supplement-3.pdf [file NIHMS761338-supplement-3.pdf]

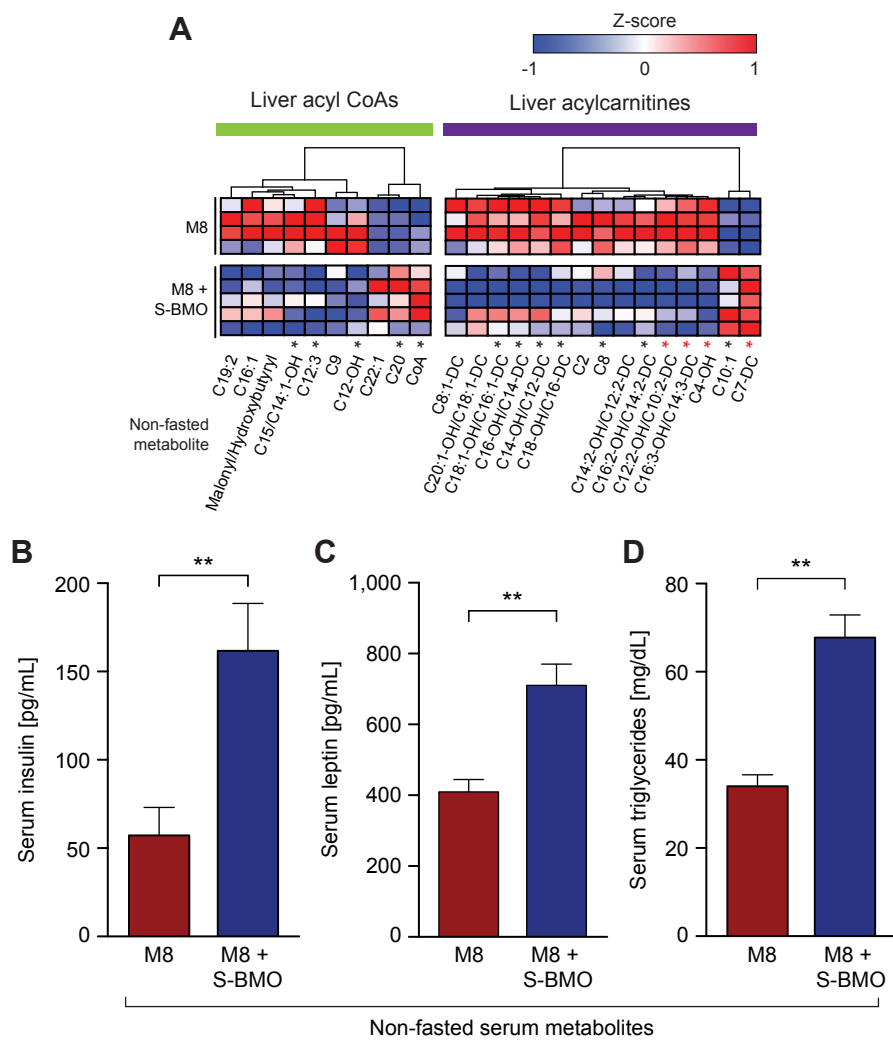

Supplement: NIHMS761338-supplement-4.pdf [file NIHMS761338-supplement-4.pdf]

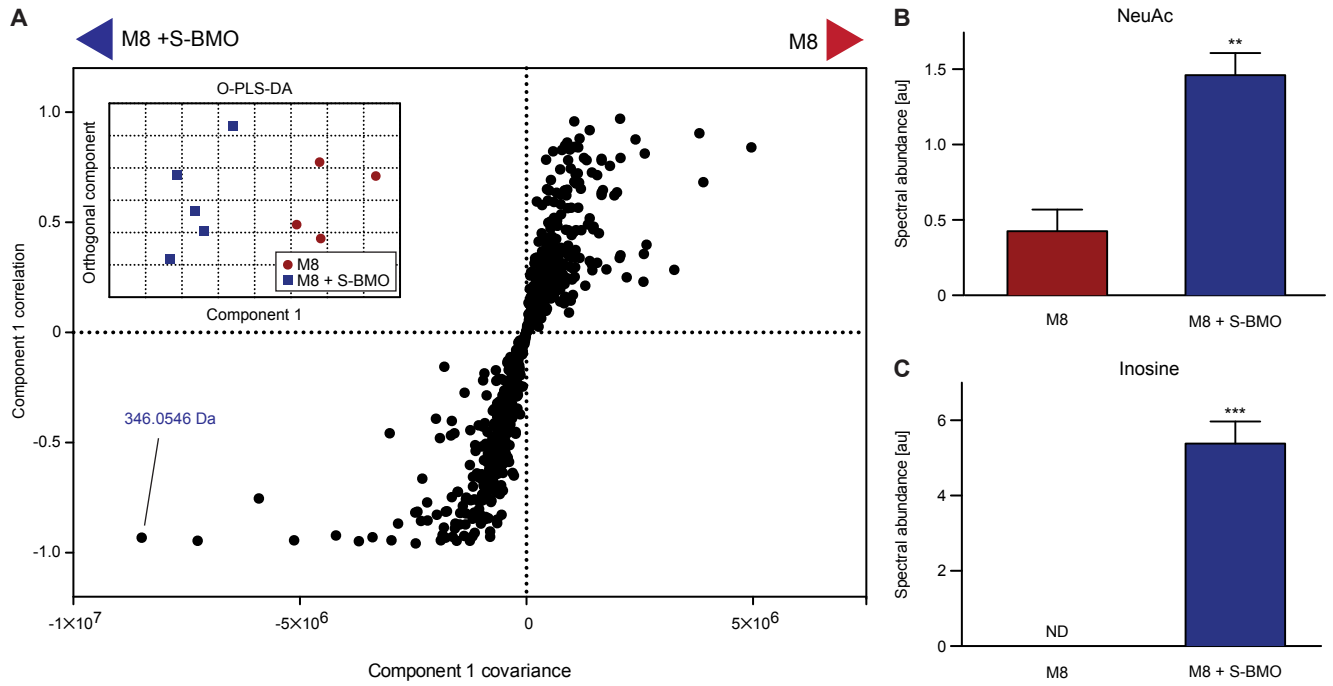

Supplement: NIHMS761338-supplement-5.pdf [file NIHMS761338-supplement-5.pdf]

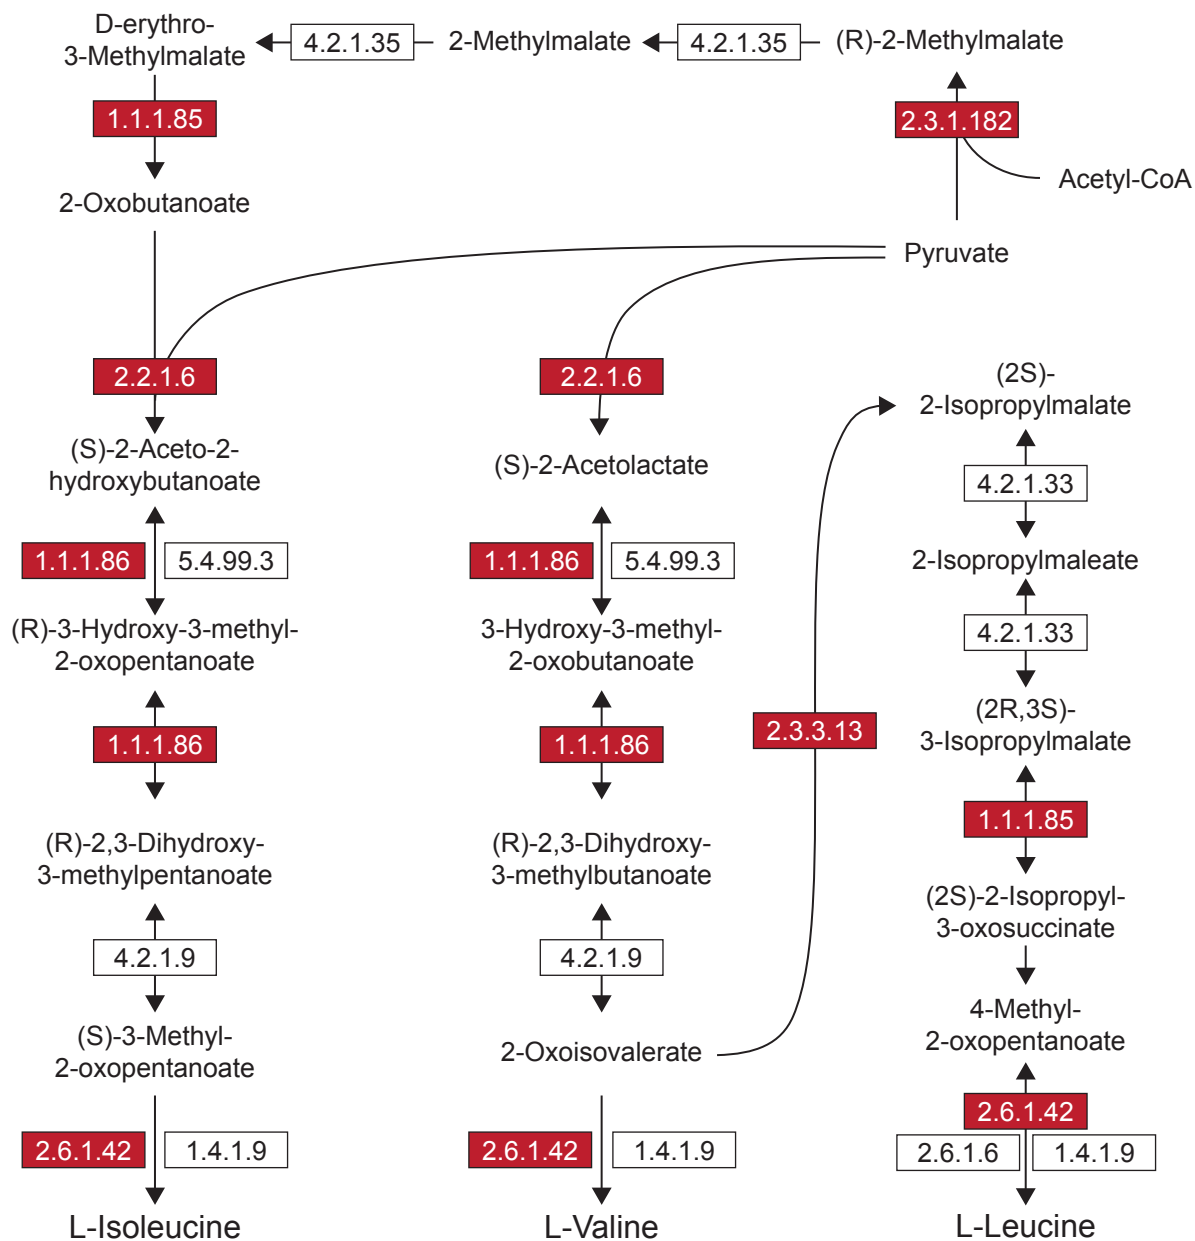

Supplement: NIHMS761338-supplement-6.pdf [file NIHMS761338-supplement-6.pdf]
